# Supplementary material for: Khat chewing, xerostomia, and unstimulated salivary flow among Yemeni adults: a cross-sectional comparative study using sialometry, the Clinical Oral Dryness Score (CODS), and the Summated Xerostomia Inventory (SXI-D)
Source: Research Square preprint supplement (doi:10.21203/rs.3.rs-8462830/v1), 2026-01-06
Supplement: Supplementary file 1 [file 2b389d4260c247b32371608e.pdf]

Email

Today's Date

As required by law, our office adheres to written policies and procedures to protect the privacy of information about you that we create, receive or maintain. Your answers are for our records only and will be kept confidential subject to applicable laws. Please note that you will be asked some questions about your responses to this questionnaire and there may be additional questions concerning your health. This information is vital to allow us to provide appropriate care for you. This office does not use this information to discriminate.

|                                                                                                  |  |                   |                                          |              |                                                   |                                          |  |
|--------------------------------------------------------------------------------------------------|--|-------------------|------------------------------------------|--------------|---------------------------------------------------|------------------------------------------|--|
| Name: Last First Middle                                                                          |  |                   | Home Phone: include area code<br>( ) ( ) |              | Business/Cell Phone: include area code<br>( ) ( ) |                                          |  |
| Address: Mailing address                                                                         |  |                   | City                                     |              | State Zip                                         |                                          |  |
| Occupation                                                                                       |  |                   | Height                                   |              | Weight                                            |                                          |  |
|                                                                                                  |  |                   | Date of Birth                            |              | Sex: M F                                          |                                          |  |
| SSN or Patient ID                                                                                |  | Emergency Contact |                                          | Relationship |                                                   | Home Phone: include area code<br>( ) ( ) |  |
|                                                                                                  |  |                   |                                          |              |                                                   | Cell Phone: include area code<br>( ) ( ) |  |
| If you are completing this form for another person, what is your relationship to that person?    |  |                   |                                          |              |                                                   |                                          |  |
| Your Name                                                                                        |  |                   | Relationship                             |              |                                                   |                                          |  |
| Do you have any of the following habits: (Check DK if you don't know the answer to the question) |  |                   |                                          |              |                                                   |                                          |  |
| Khat chewing _____ how many times _____ Yes No DK                                                |  |                   |                                          |              |                                                   |                                          |  |
| Shamma user _____ Yes No DK                                                                      |  |                   |                                          |              |                                                   |                                          |  |
| Smoking _____ Yes No DK                                                                          |  |                   |                                          |              |                                                   |                                          |  |
| Tobacco chewing _____ Yes No DK                                                                  |  |                   |                                          |              |                                                   |                                          |  |

## Dental Information

For the following questions, please mark (X) your responses to the following questions.

|                                                                      | Yes No DK                                                                  |                                                             | Yes No DK                                                                  |
|----------------------------------------------------------------------|----------------------------------------------------------------------------|-------------------------------------------------------------|----------------------------------------------------------------------------|
| Do your gums bleed when you brush or floss?                          | <input type="checkbox"/> <input type="checkbox"/> <input type="checkbox"/> | Do you have earaches or neck pains?                         | <input type="checkbox"/> <input type="checkbox"/> <input type="checkbox"/> |
| Are your teeth sensitive to cold, hot, sweets or pressure?           | <input type="checkbox"/> <input type="checkbox"/> <input type="checkbox"/> | Do you have any clicking, popping or discomfort in the jaw? | <input type="checkbox"/> <input type="checkbox"/> <input type="checkbox"/> |
| Is your mouth dry?                                                   | <input type="checkbox"/> <input type="checkbox"/> <input type="checkbox"/> | Do you bruise or grind your teeth?                          | <input type="checkbox"/> <input type="checkbox"/> <input type="checkbox"/> |
| Have you had any periodontal (gum) treatments?                       | <input type="checkbox"/> <input type="checkbox"/> <input type="checkbox"/> | Do you have sores or ulcers in your mouth?                  | <input type="checkbox"/> <input type="checkbox"/> <input type="checkbox"/> |
| Have you ever had orthodontic (braces) treatment?                    | <input type="checkbox"/> <input type="checkbox"/> <input type="checkbox"/> | Do you wear dentures or partials?                           | <input type="checkbox"/> <input type="checkbox"/> <input type="checkbox"/> |
| Have you had any problems associated with previous dental treatment? | <input type="checkbox"/> <input type="checkbox"/> <input type="checkbox"/> | Do you participate in active recreational activities?       | <input type="checkbox"/> <input type="checkbox"/> <input type="checkbox"/> |
| Is your home water supply fluoridated?                               | <input type="checkbox"/> <input type="checkbox"/> <input type="checkbox"/> | Have you ever had a serious injury to your head or mouth?   | <input type="checkbox"/> <input type="checkbox"/> <input type="checkbox"/> |
| Do you drink bottled or filtered water?                              | <input type="checkbox"/> <input type="checkbox"/> <input type="checkbox"/> | Date of your last dental exam:                              |                                                                            |
| If yes, how often? Circle one: DAILY / WEEKLY / OCCASIONALLY         |                                                                            | What was done at that time?                                 |                                                                            |
| Are you currently experiencing dental pain or discomfort?            | <input type="checkbox"/> <input type="checkbox"/> <input type="checkbox"/> | Date of last dental x-rays:                                 |                                                                            |

What is the reason for your dental visit today?

## Medical Information

Please mark (X) your response to indicate if you have or have not had any of the following diseases or problems.

|                                                                                                                                                   |                                                                                                                                                                          |
|---------------------------------------------------------------------------------------------------------------------------------------------------|--------------------------------------------------------------------------------------------------------------------------------------------------------------------------|
| Are you now under the care of a physician? <input type="checkbox"/> <input type="checkbox"/> <input type="checkbox"/>                             | Have you had a serious illness, operation or been hospitalized in the past 5 years? Yes No DK <input type="checkbox"/> <input type="checkbox"/> <input type="checkbox"/> |
| Physician Name: _____<br>Address/City/State/Zip: _____                                                                                            | Phone: include area code _____                                                                                                                                           |
| Are you in good health? <input type="checkbox"/> <input type="checkbox"/> <input type="checkbox"/>                                                | If yes, what was the illness or problem? _____                                                                                                                           |
| Has there been any change in your general health within the past year? <input type="checkbox"/> <input type="checkbox"/> <input type="checkbox"/> | Are you taking or have you recently taken any prescription or over the counter medicine(s)? <input type="checkbox"/> <input type="checkbox"/> <input type="checkbox"/>   |
| If yes, what condition is being treated? _____                                                                                                    | If so, please list all, including vitamins, natural or herbal preparations and/or dietary supplements: _____                                                             |
| Date of last physical exam: _____                                                                                                                 | _____                                                                                                                                                                    |

|               |       |
|---------------|-------|
| patient name: | age:  |
| Gender        | date: |

Before  
chewing khat

| Collection period (minutes) USF | Non stimulated salivary Flow rate | Total Flow rate for 15 minutes | Salivary flow rate per minute |
|---------------------------------|-----------------------------------|--------------------------------|-------------------------------|
| 5 min                           |                                   |                                |                               |
| 5 min                           |                                   |                                |                               |
| 5 min                           |                                   |                                |                               |

|                                                                                                       |
|-------------------------------------------------------------------------------------------------------|
| $\text{Salivary flow rate per minutes} = \frac{\text{Total salivary flow}}{\text{Number of minutes}}$ |
|-------------------------------------------------------------------------------------------------------|

# Medical Information Please mark (X) your response to indicate if you have or have not had any of the following diseases or problems.

| Check (X) if you Don't know the answer to the question                                                                                                                                        |  | Yes | No | DK |
|-----------------------------------------------------------------------------------------------------------------------------------------------------------------------------------------------|--|-----|----|----|
| Do you wear contact lenses? <input type="checkbox"/> <input type="checkbox"/> <input type="checkbox"/>                                                                                        |  |     |    |    |
| Do you use controlled substances (drugs)? <input type="checkbox"/> <input type="checkbox"/> <input type="checkbox"/>                                                                          |  |     |    |    |
| Do you use tobacco (smoking, snuff, chew, bidis)? <input type="checkbox"/> <input type="checkbox"/> <input type="checkbox"/>                                                                  |  |     |    |    |
| If so, how interested are you in stopping?<br>Circle one: VERY / SOMEWHAT / NOT INTERESTED <input type="checkbox"/> <input type="checkbox"/> <input type="checkbox"/>                         |  |     |    |    |
| Do you drink alcoholic beverages? <input type="checkbox"/> <input type="checkbox"/> <input type="checkbox"/>                                                                                  |  |     |    |    |
| If yes, how much alcohol did you drink in the last 24 hours?<br>If yes, how much do you typically drink in a week? <input type="checkbox"/> <input type="checkbox"/> <input type="checkbox"/> |  |     |    |    |
| <b>WOMEN ONLY</b> Are you: <input type="checkbox"/> <input type="checkbox"/> <input type="checkbox"/>                                                                                         |  |     |    |    |
| Pregnant? <input type="checkbox"/> <input type="checkbox"/> <input type="checkbox"/>                                                                                                          |  |     |    |    |
| Number of weeks: <input type="checkbox"/> <input type="checkbox"/> <input type="checkbox"/>                                                                                                   |  |     |    |    |
| Taking birth control pills or hormonal replacement? <input type="checkbox"/> <input type="checkbox"/> <input type="checkbox"/>                                                                |  |     |    |    |
| Hunting? <input type="checkbox"/> <input type="checkbox"/> <input type="checkbox"/>                                                                                                           |  |     |    |    |
| <b>Yes No DK</b>                                                                                                                                                                              |  |     |    |    |
| Drugs <input type="checkbox"/> <input type="checkbox"/> <input type="checkbox"/>                                                                                                              |  |     |    |    |
| Aspirin <input type="checkbox"/> <input type="checkbox"/> <input type="checkbox"/>                                                                                                            |  |     |    |    |
| Penicillin or other antibiotics <input type="checkbox"/> <input type="checkbox"/> <input type="checkbox"/>                                                                                    |  |     |    |    |
| Barbiturates, sedatives, or sleeping pills <input type="checkbox"/> <input type="checkbox"/> <input type="checkbox"/>                                                                         |  |     |    |    |
| Sulfadiazine <input type="checkbox"/> <input type="checkbox"/> <input type="checkbox"/>                                                                                                       |  |     |    |    |
| Codeine or other narcotics <input type="checkbox"/> <input type="checkbox"/> <input type="checkbox"/>                                                                                         |  |     |    |    |
| Anticholinergic <input type="checkbox"/> <input type="checkbox"/> <input type="checkbox"/>                                                                                                    |  |     |    |    |
| Antidepressant drugs <input type="checkbox"/> <input type="checkbox"/> <input type="checkbox"/>                                                                                               |  |     |    |    |
| Decongestant <input type="checkbox"/> <input type="checkbox"/> <input type="checkbox"/>                                                                                                       |  |     |    |    |
| Antihistamines <input type="checkbox"/> <input type="checkbox"/> <input type="checkbox"/>                                                                                                     |  |     |    |    |
| Diuretics <input type="checkbox"/> <input type="checkbox"/> <input type="checkbox"/>                                                                                                          |  |     |    |    |
| Skeletal muscle relaxant <input type="checkbox"/> <input type="checkbox"/> <input type="checkbox"/>                                                                                           |  |     |    |    |
| Cytotoxic drugs <input type="checkbox"/> <input type="checkbox"/> <input type="checkbox"/>                                                                                                    |  |     |    |    |
| Antihypertensive <input type="checkbox"/> <input type="checkbox"/> <input type="checkbox"/>                                                                                                   |  |     |    |    |
| Please mark (X) your response to indicate if you have or have not had any of the following diseases or problems.                                                                              |  |     |    |    |
| Artificial (prosthetic) heart valve <input type="checkbox"/> <input type="checkbox"/> <input type="checkbox"/>                                                                                |  |     |    |    |
| Previous infective endocarditis <input type="checkbox"/> <input type="checkbox"/> <input type="checkbox"/>                                                                                    |  |     |    |    |
| Damaged valves in transplanted heart <input type="checkbox"/> <input type="checkbox"/> <input type="checkbox"/>                                                                               |  |     |    |    |
| Congenital heart disease (CHD) <input type="checkbox"/> <input type="checkbox"/> <input type="checkbox"/>                                                                                     |  |     |    |    |
| Unrepaired, cyanotic CHD <input type="checkbox"/> <input type="checkbox"/> <input type="checkbox"/>                                                                                           |  |     |    |    |
| Repaired (completely) in last 6 months <input type="checkbox"/> <input type="checkbox"/> <input type="checkbox"/>                                                                             |  |     |    |    |
| Repaired CHD with residual defects <input type="checkbox"/> <input type="checkbox"/> <input type="checkbox"/>                                                                                 |  |     |    |    |
| Except for the conditions listed above, antibiotic prophylaxis is no longer recommended for any other form of CHD.                                                                            |  |     |    |    |
| Cardiovascular disease <input type="checkbox"/> <input type="checkbox"/> <input type="checkbox"/>                                                                                             |  |     |    |    |
| Angina <input type="checkbox"/> <input type="checkbox"/> <input type="checkbox"/>                                                                                                             |  |     |    |    |
| Arteriosclerosis <input type="checkbox"/> <input type="checkbox"/> <input type="checkbox"/>                                                                                                   |  |     |    |    |
| Congestive heart failure <input type="checkbox"/> <input type="checkbox"/> <input type="checkbox"/>                                                                                           |  |     |    |    |
| Damaged heart valves <input type="checkbox"/> <input type="checkbox"/> <input type="checkbox"/>                                                                                               |  |     |    |    |
| Heart attack <input type="checkbox"/> <input type="checkbox"/> <input type="checkbox"/>                                                                                                       |  |     |    |    |
| Heart murmur <input type="checkbox"/> <input type="checkbox"/> <input type="checkbox"/>                                                                                                       |  |     |    |    |
| Low blood pressure <input type="checkbox"/> <input type="checkbox"/> <input type="checkbox"/>                                                                                                 |  |     |    |    |
| High blood pressure <input type="checkbox"/> <input type="checkbox"/> <input type="checkbox"/>                                                                                                |  |     |    |    |
| Other congenital <input type="checkbox"/> <input type="checkbox"/> <input type="checkbox"/>                                                                                                   |  |     |    |    |
| heart defects <input type="checkbox"/> <input type="checkbox"/> <input type="checkbox"/>                                                                                                      |  |     |    |    |
| Mitral valve prolapse <input type="checkbox"/> <input type="checkbox"/> <input type="checkbox"/>                                                                                              |  |     |    |    |
| Pacemaker <input type="checkbox"/> <input type="checkbox"/> <input type="checkbox"/>                                                                                                          |  |     |    |    |
| Rheumatic fever <input type="checkbox"/> <input type="checkbox"/> <input type="checkbox"/>                                                                                                    |  |     |    |    |
| Rheumatic heart disease <input type="checkbox"/> <input type="checkbox"/> <input type="checkbox"/>                                                                                            |  |     |    |    |
| Abnormal bleeding <input type="checkbox"/> <input type="checkbox"/> <input type="checkbox"/>                                                                                                  |  |     |    |    |
| Anemia <input type="checkbox"/> <input type="checkbox"/> <input type="checkbox"/>                                                                                                             |  |     |    |    |
| Blood transfusion <input type="checkbox"/> <input type="checkbox"/> <input type="checkbox"/>                                                                                                  |  |     |    |    |
| If yes, date: <input type="checkbox"/> <input type="checkbox"/> <input type="checkbox"/>                                                                                                      |  |     |    |    |
| Hemophilia <input type="checkbox"/> <input type="checkbox"/> <input type="checkbox"/>                                                                                                         |  |     |    |    |
| AIDS or HIV infection <input type="checkbox"/> <input type="checkbox"/> <input type="checkbox"/>                                                                                              |  |     |    |    |
| Arthritis <input type="checkbox"/> <input type="checkbox"/> <input type="checkbox"/>                                                                                                          |  |     |    |    |
| Autoimmune disease <input type="checkbox"/> <input type="checkbox"/> <input type="checkbox"/>                                                                                                 |  |     |    |    |
| Rheumatoid arthritis <input type="checkbox"/> <input type="checkbox"/> <input type="checkbox"/>                                                                                               |  |     |    |    |
| Systemic lupus erythematosus <input type="checkbox"/> <input type="checkbox"/> <input type="checkbox"/>                                                                                       |  |     |    |    |
| Asthma <input type="checkbox"/> <input type="checkbox"/> <input type="checkbox"/>                                                                                                             |  |     |    |    |
| Bronchitis <input type="checkbox"/> <input type="checkbox"/> <input type="checkbox"/>                                                                                                         |  |     |    |    |
| Emphysema <input type="checkbox"/> <input type="checkbox"/> <input type="checkbox"/>                                                                                                          |  |     |    |    |
| Sinus trouble <input type="checkbox"/> <input type="checkbox"/> <input type="checkbox"/>                                                                                                      |  |     |    |    |
| Tuberculosis <input type="checkbox"/> <input type="checkbox"/> <input type="checkbox"/>                                                                                                       |  |     |    |    |
| Cancer/Chemotherapy <input type="checkbox"/> <input type="checkbox"/> <input type="checkbox"/>                                                                                                |  |     |    |    |
| Radiation Treatment <input type="checkbox"/> <input type="checkbox"/> <input type="checkbox"/>                                                                                                |  |     |    |    |
| Chest pain upon exertion <input type="checkbox"/> <input type="checkbox"/> <input type="checkbox"/>                                                                                           |  |     |    |    |
| Chronic pain <input type="checkbox"/> <input type="checkbox"/> <input type="checkbox"/>                                                                                                       |  |     |    |    |
| Diabetes Type I or II <input type="checkbox"/> <input type="checkbox"/> <input type="checkbox"/>                                                                                              |  |     |    |    |
| Eating disorder <input type="checkbox"/> <input type="checkbox"/> <input type="checkbox"/>                                                                                                    |  |     |    |    |
| Malnutrition <input type="checkbox"/> <input type="checkbox"/> <input type="checkbox"/>                                                                                                       |  |     |    |    |
| Gastrointestinal disease <input type="checkbox"/> <input type="checkbox"/> <input type="checkbox"/>                                                                                           |  |     |    |    |
| G.E. Reflux/persistent <input type="checkbox"/> <input type="checkbox"/> <input type="checkbox"/>                                                                                             |  |     |    |    |
| heartburn <input type="checkbox"/> <input type="checkbox"/> <input type="checkbox"/>                                                                                                          |  |     |    |    |
| Ulcers <input type="checkbox"/> <input type="checkbox"/> <input type="checkbox"/>                                                                                                             |  |     |    |    |
| Thyroid problems <input type="checkbox"/> <input type="checkbox"/> <input type="checkbox"/>                                                                                                   |  |     |    |    |
| Stroke <input type="checkbox"/> <input type="checkbox"/> <input type="checkbox"/>                                                                                                             |  |     |    |    |
| Glaucoma <input type="checkbox"/> <input type="checkbox"/> <input type="checkbox"/>                                                                                                           |  |     |    |    |
| Hepatitis, jaundice or liver disease <input type="checkbox"/> <input type="checkbox"/> <input type="checkbox"/>                                                                               |  |     |    |    |
| Epilepsy <input type="checkbox"/> <input type="checkbox"/> <input type="checkbox"/>                                                                                                           |  |     |    |    |
| Fainting spells or seizures <input type="checkbox"/> <input type="checkbox"/> <input type="checkbox"/>                                                                                        |  |     |    |    |
| Neurological disorders <input type="checkbox"/> <input type="checkbox"/> <input type="checkbox"/>                                                                                             |  |     |    |    |
| Sleep disorder <input type="checkbox"/> <input type="checkbox"/> <input type="checkbox"/>                                                                                                     |  |     |    |    |
| Do you snore? <input type="checkbox"/> <input type="checkbox"/> <input type="checkbox"/>                                                                                                      |  |     |    |    |
| Mental health disorders <input type="checkbox"/> <input type="checkbox"/> <input type="checkbox"/>                                                                                            |  |     |    |    |
| Specify: <input type="checkbox"/> <input type="checkbox"/> <input type="checkbox"/>                                                                                                           |  |     |    |    |
| Recurrent infections <input type="checkbox"/> <input type="checkbox"/> <input type="checkbox"/>                                                                                               |  |     |    |    |
| Type of infection: <input type="checkbox"/> <input type="checkbox"/> <input type="checkbox"/>                                                                                                 |  |     |    |    |
| Kidney problems <input type="checkbox"/> <input type="checkbox"/> <input type="checkbox"/>                                                                                                    |  |     |    |    |
| Night sweats <input type="checkbox"/> <input type="checkbox"/> <input type="checkbox"/>                                                                                                       |  |     |    |    |
| Osteoporosis <input type="checkbox"/> <input type="checkbox"/> <input type="checkbox"/>                                                                                                       |  |     |    |    |
| Persistent swollen glands in neck <input type="checkbox"/> <input type="checkbox"/> <input type="checkbox"/>                                                                                  |  |     |    |    |
| Severe headaches/migraines <input type="checkbox"/> <input type="checkbox"/> <input type="checkbox"/>                                                                                         |  |     |    |    |
| Severe or rapid weight loss <input type="checkbox"/> <input type="checkbox"/> <input type="checkbox"/>                                                                                        |  |     |    |    |
| Sexually transmitted disease <input type="checkbox"/> <input type="checkbox"/> <input type="checkbox"/>                                                                                       |  |     |    |    |
| Excessive urination <input type="checkbox"/> <input type="checkbox"/> <input type="checkbox"/>                                                                                                |  |     |    |    |

Has a physician or previous dentist recommended that you take antibiotics prior to your dental treatment? ☐ ☐ ☐

Name of physician or dentist making recommendation: \_\_\_\_\_ Phone: (include area code) \_\_\_\_\_  
( )

Do you have any disease, condition, or problem not listed above that you think I should know about? ☐ ☐ ☐

Please explain: \_\_\_\_\_

**NOTE: Both doctor and patient are encouraged to discuss any and all relevant patient health issues prior to treatment.**

I certify that I have read and understand the above and that the information given on this form is accurate. I understand the importance of a truthful health history and that my dentist and his/her staff will rely on this information for treating me. I acknowledge that my questions, if any, about inquiries set forth above have been answered to my satisfaction. I will not hold my dentist, or any other member of his/her staff, responsible for any action they take or do not take because of errors or omissions that I may have made in the completion of this form.

Signature of Patient/Legal Guardian: \_\_\_\_\_ Date: \_\_\_\_\_

Signature of Dentist: \_\_\_\_\_ Date: \_\_\_\_\_

After chewing  
khat

| Collection period<br>(minutes) USF | Non<br>stimulated<br>salivary Flow<br>rate | Total Flow<br>rate for 15<br>minutes | Salivary flow<br>rate per<br>minute |
|------------------------------------|--------------------------------------------|--------------------------------------|-------------------------------------|
| 5 min                              |                                            |                                      |                                     |
| 5 min                              |                                            |                                      |                                     |
| 5 min                              |                                            |                                      |                                     |

Salivary flow rate per minute: =  $\frac{\text{Total salivary flow}}{\text{Number of minutes}}$

| Challacombe scale designed to produce a scoring system called <b>CODS</b> ; Clinical Oral Dryness Score; which quantifies the extent of dryness of the mouth (Osailan et al ,2012); | Yes<br>Scoring= 1 | No<br>Scoring= 0 |
|-------------------------------------------------------------------------------------------------------------------------------------------------------------------------------------|-------------------|------------------|
| 1. Mirror or wooden tongue depressor sticks to buccal mucosa                                                                                                                        |                   |                  |
| 2. Mirror or wooden tongue depressor sticks to tongue                                                                                                                               |                   |                  |
| 3. Frothy Saliva                                                                                                                                                                    |                   |                  |
| 4. No saliva pooling in floor of mouth                                                                                                                                              |                   |                  |
| 5. Tongue shows loss of papillae                                                                                                                                                    |                   |                  |
| 6. Altered /smooth gingival architecture (especially anterior)                                                                                                                      |                   |                  |
| 7. Glassy appearance of oral mucosa (especially palate)                                                                                                                             |                   |                  |
| 8. Tongue lobulated /deeply fissured                                                                                                                                                |                   |                  |
| 9. Active or recently restored (last 6 months) cervical caries (> 2 teeth)                                                                                                          |                   |                  |
| 10. Mucosal debris on palate (excluding under dentures)                                                                                                                             |                   |                  |

**CODS of 0-10 = .....**

| Questionnaire Items of the Modified Xerostomia Inventory-Dutch version (Villa et al,2014) | Never<br>= scoring 1 | Occasionally<br>= scoring 2 | Ever<br>= scoring 3 |
|-------------------------------------------------------------------------------------------|----------------------|-----------------------------|---------------------|
| 1. My mouth feels dry when eating a meal                                                  |                      |                             |                     |
| 2. My mouth feels dry                                                                     |                      |                             |                     |
| 3. I have difficulty in eating dry foods                                                  |                      |                             |                     |
| 4. I have difficulties swallowing certain foods                                           |                      |                             |                     |
| 5. My lips feel dry                                                                       |                      |                             |                     |

**Summated of Modified Xerostomia Inventory-Dutch version = .....**
