# Supplementary material for: Khat chewing, xerostomia, and unstimulated salivary flow among Yemeni adults: a cross-sectional comparative study using sialometry, the Clinical Oral Dryness Score (CODS), and the Summated Xerostomia Inventory (SXI-D)
Source: Research Square preprint supplement (doi:10.21203/rs.3.rs-8462830/v1), 2026-01-06

Republic of Yemen

Sana'a University

Faculty of Dentistry

Date / صادر مكتب المراجعة

Our Ref / التاريخ: ١٤٤٤/١٢/٢١

File No. / الرقم: ١٤٤٤

بِسْمِ اللَّهِ الرَّحْمَنِ الرَّحِيمِ

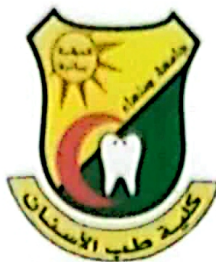

الجمهورية اليمنية  
جامعة صنعاء  
كلية طب الأسنان

التاريخ /

الإشارة رقم /

رقم الملف /

## Medical Ethics Committee Approval

This is to declare that the medical ethics committee has reviewed the proposal entitled:

( Estimation of the level of salivary flow among Yemeni khat chewers and  
comparing with non- chewers)

| Presented by:                      | Department:                                                         | Faculty                                    |
|------------------------------------|---------------------------------------------------------------------|--------------------------------------------|
| Mohammed Saeed Mohammed<br>Bintaja | Oral Medicine; Oral Diagnosis;<br>Periodontology and Oral Radiology | Faculty of Dentistry,<br>Sana'a University |

The proposed study has fulfilled the guarantees and safeguard for medical research ethics. It is in compliance with policies of the committee. An ethical approval reference number (OMPR:05/12/2024) has been granted.

Head of the Ethical Committee

Dr. Ramy Abdul Rahman Ishaq

Dean, Faculty of Dentistry

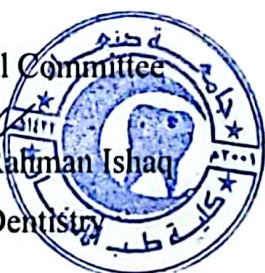

Supplement: Supplementary file 2 [file f0816166ae33c201045ebe51.pdf]
